# Supplementary material for: Position-dependent hexaarylbenzene AIEgens: synthesis, characterization and optical properties
Source: Royal Society of Chemistry journal article supplement (doi:10.1039/d3nj05914f), 2024-01-01
Supplement: d3nj05914f1.pdf [file d3nj05914f1.pdf]

## Position-dependent hexaarylbenzene AIEgens: synthesis, characterization and optical properties

Wen-Xuan Zhao, Li-Feng Yang, Dan Yu, Fei-Yu Chen, Ling Liang, Jing-Yi, Cao, Guang, Yang, Shu-

Hai Chen, Takehiko Yamato,\* Carl Redshaw, and Chuan-Zeng Wang\*

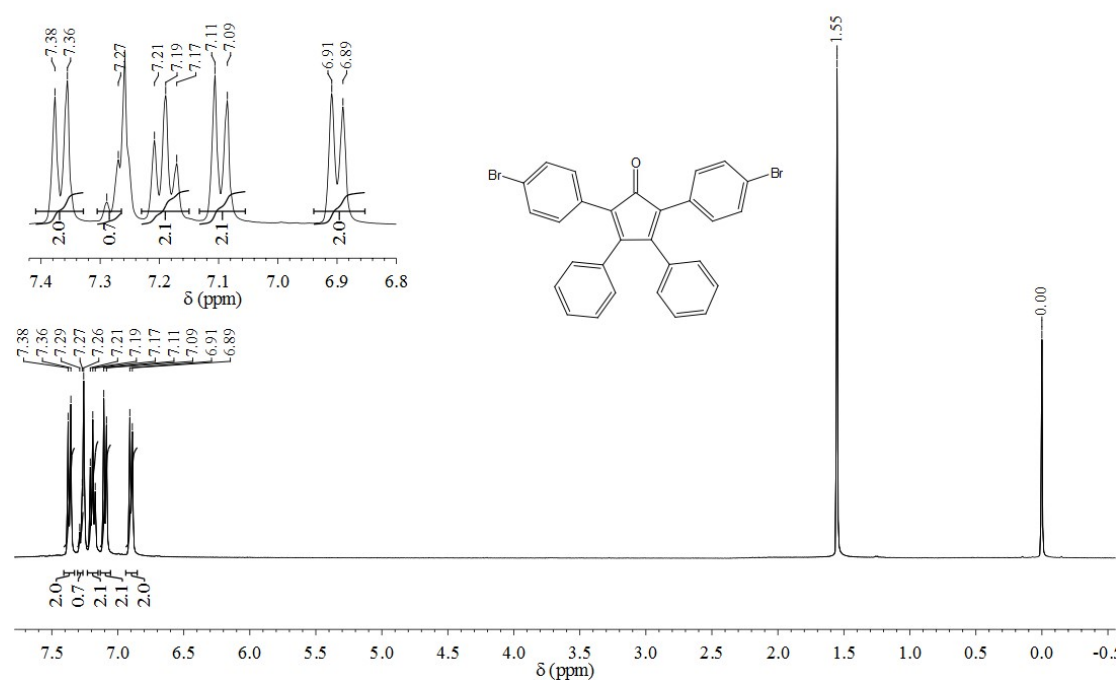

**Figure S1.**  $^1\text{H-NMR}$  spectrum of **3a** (400 MHz,  $\text{CDCl}_3$ ).

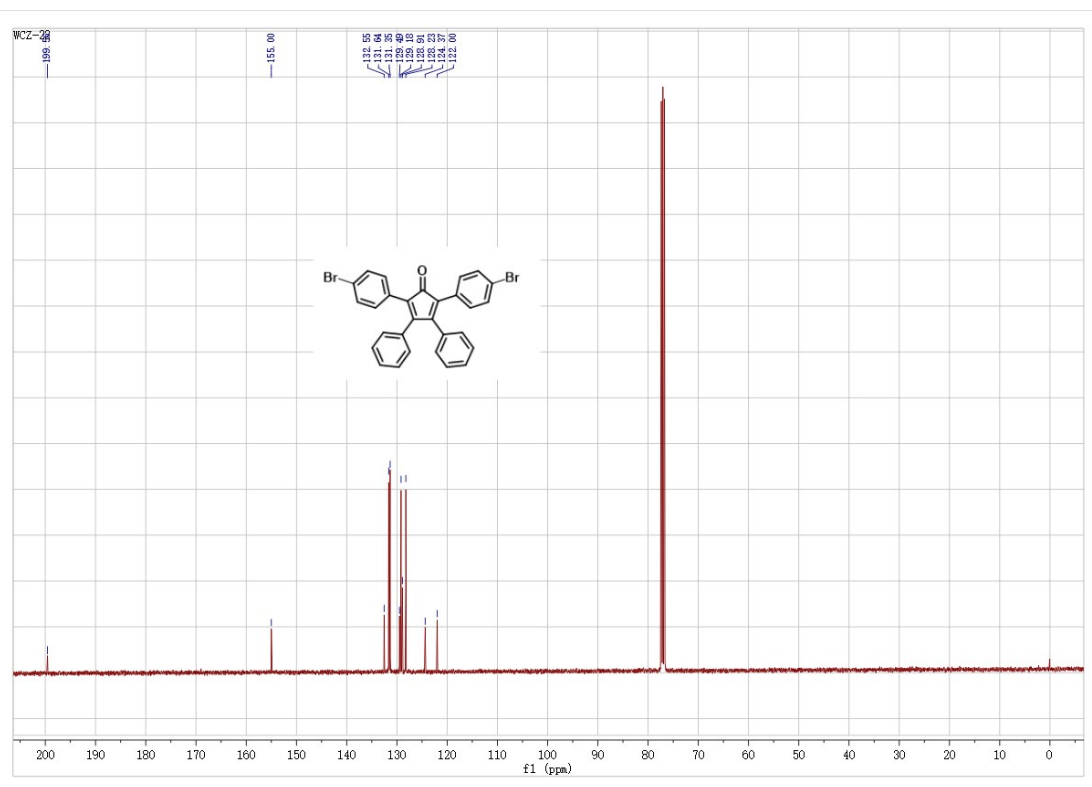

**Figure S2.**  $^{13}\text{C}$ -NMR spectrum of **3a** (100 MHz,  $\text{CDCl}_3$ ).

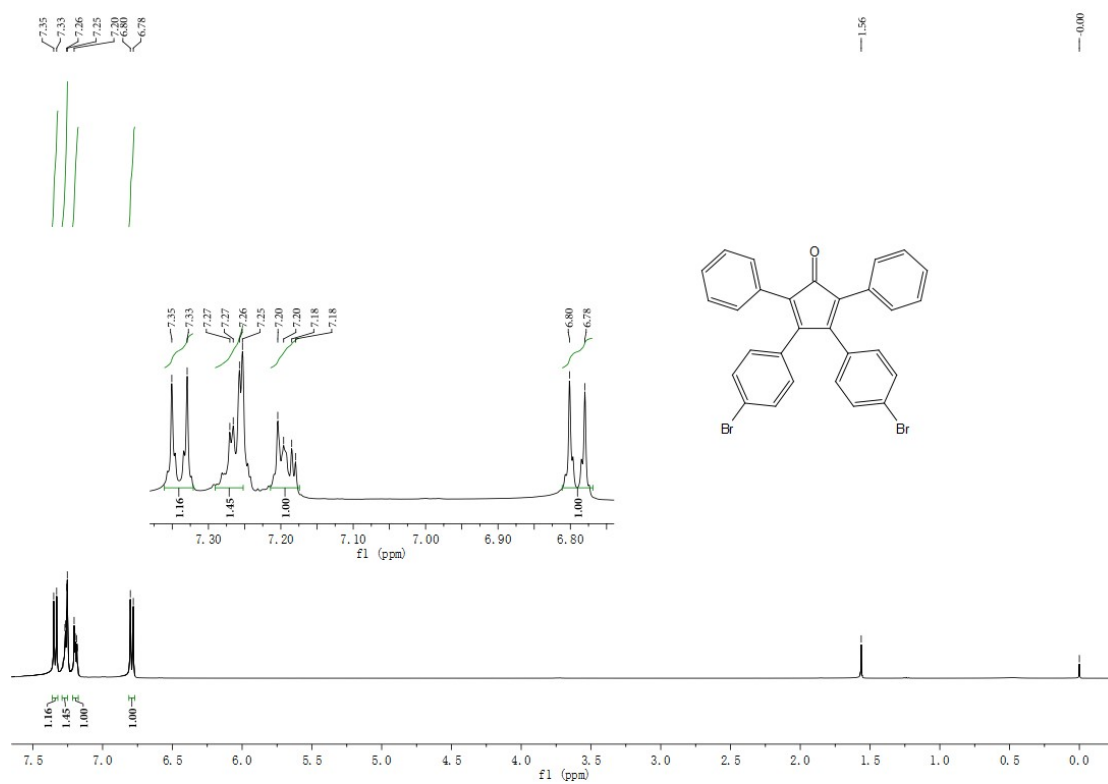

**Figure S3.**  $^1\text{H}$ -NMR spectrum of **3b** (400 MHz,  $\text{CDCl}_3$ ).

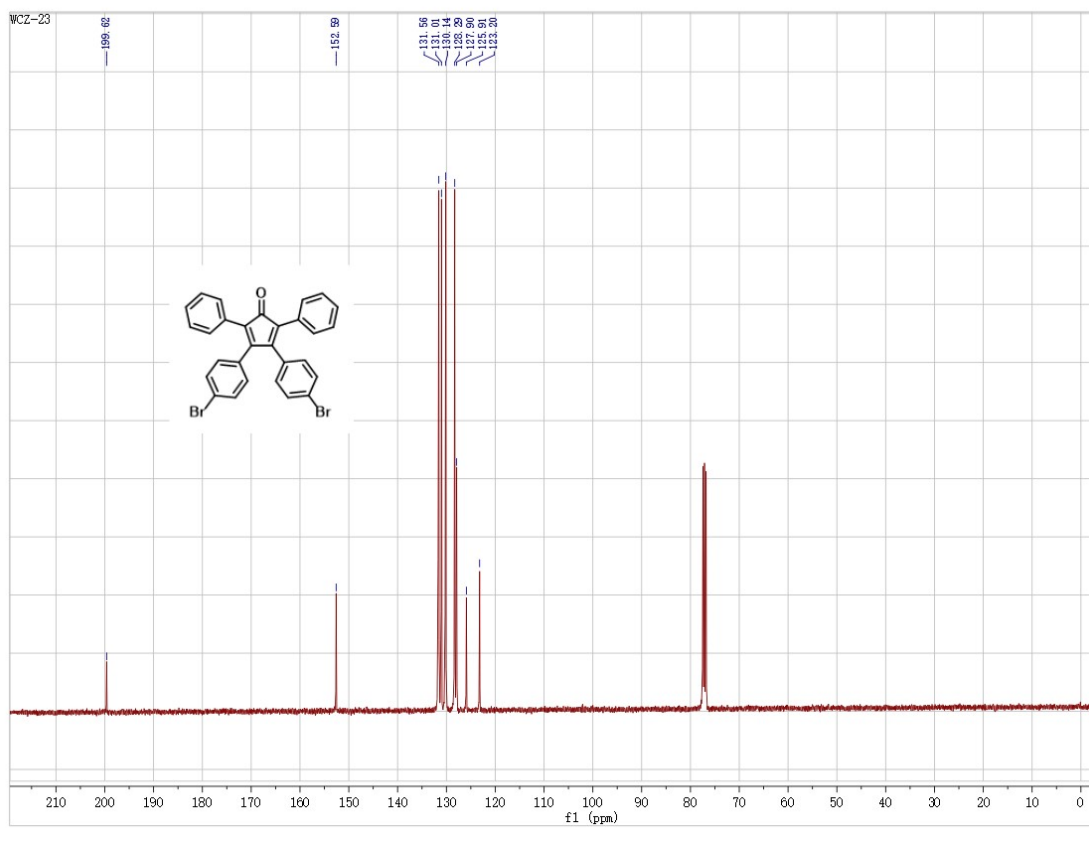

**Figure S4.**  $^{13}\text{C}$ -NMR spectrum of **3b** (100 MHz,  $\text{CDCl}_3$ ).

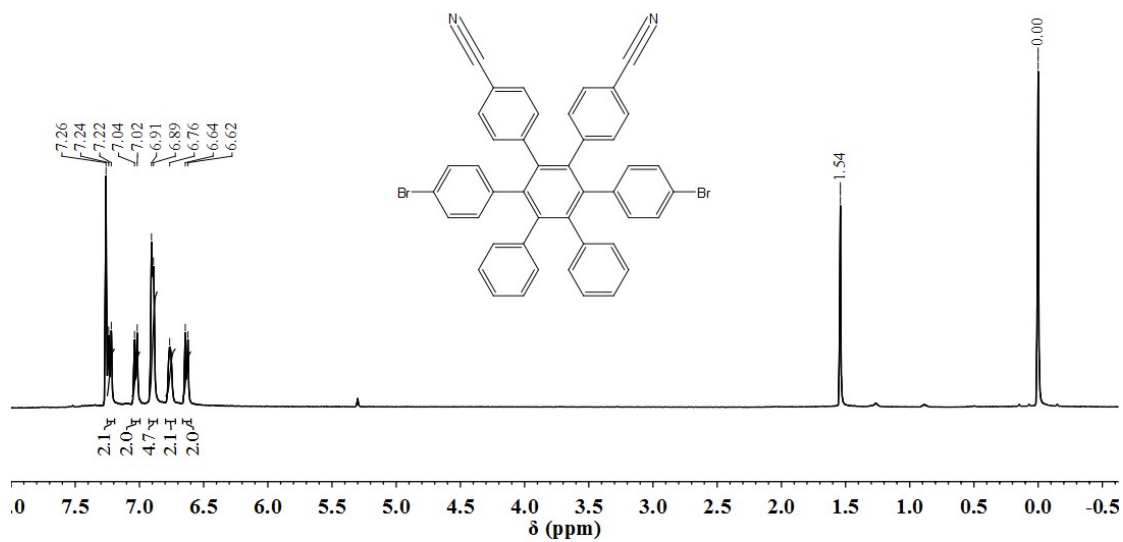

**Figure S5.**  $^1\text{H}$ -NMR spectrum of compound **4a** (400 MHz,  $\text{CDCl}_3$ ).

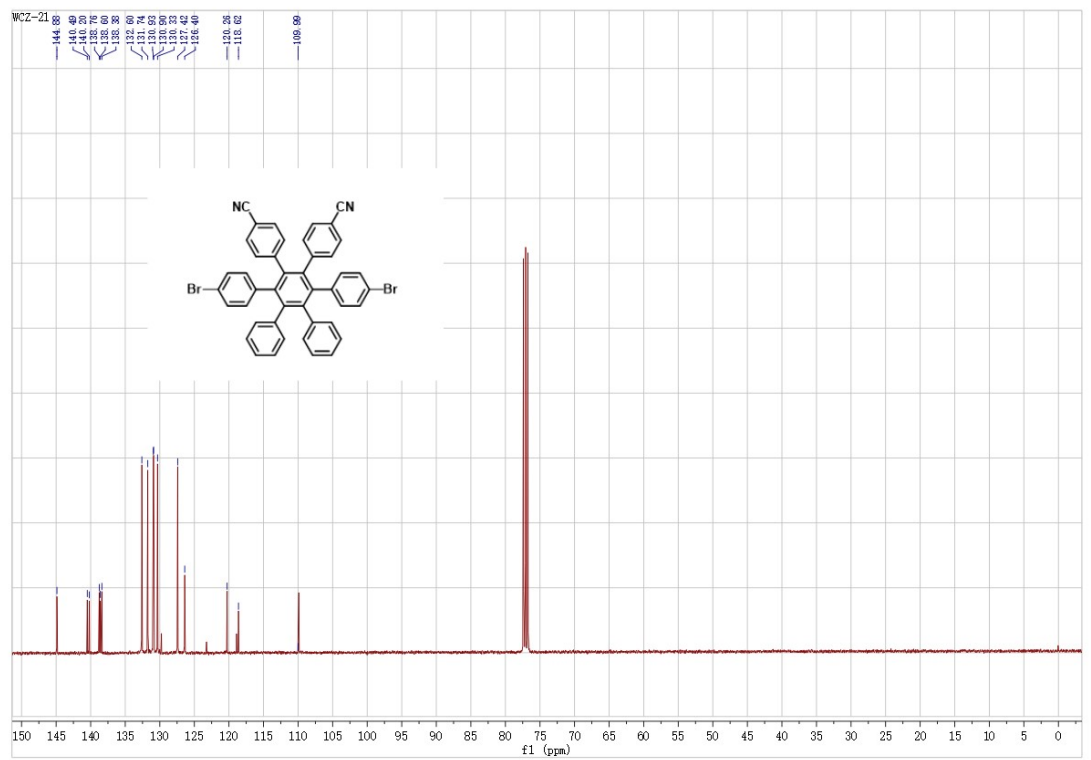

**Figure S6.**  $^{13}\text{C-NMR}$  spectrum of **4a** (100 MHz,  $\text{CDCl}_3$ ).

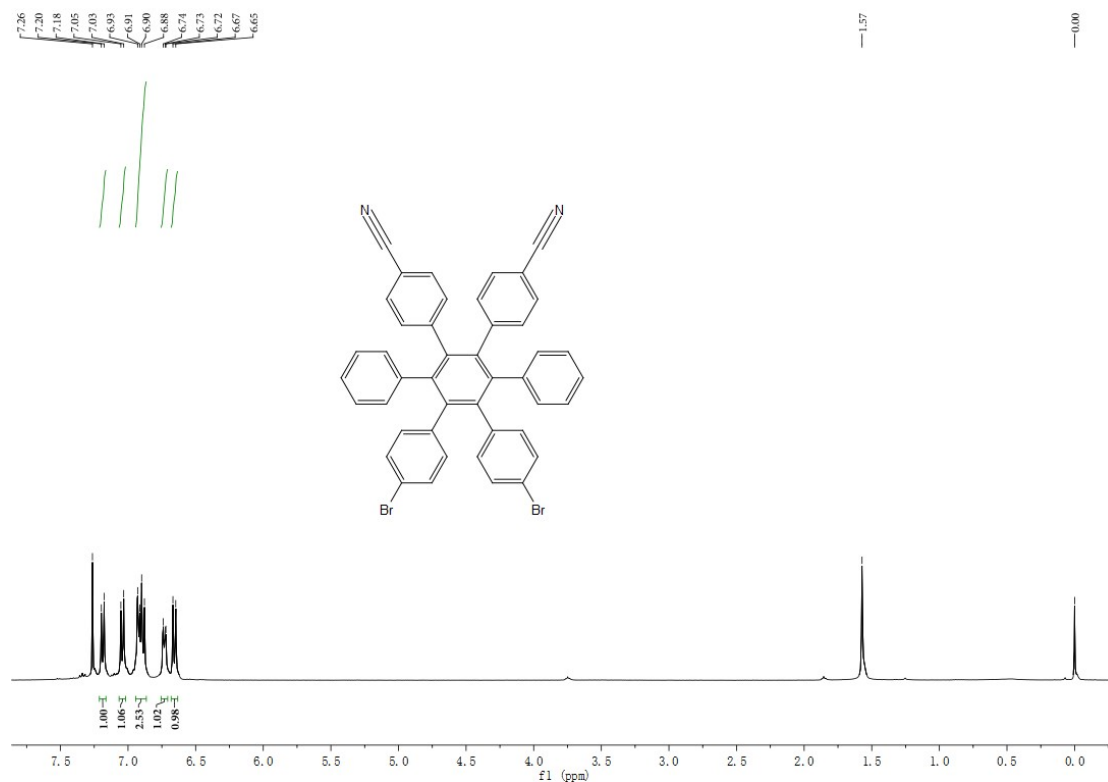

**Figure S7.**  $^1\text{H-NMR}$  spectrum of compound **4b** (400 MHz,  $\text{CDCl}_3$ ).

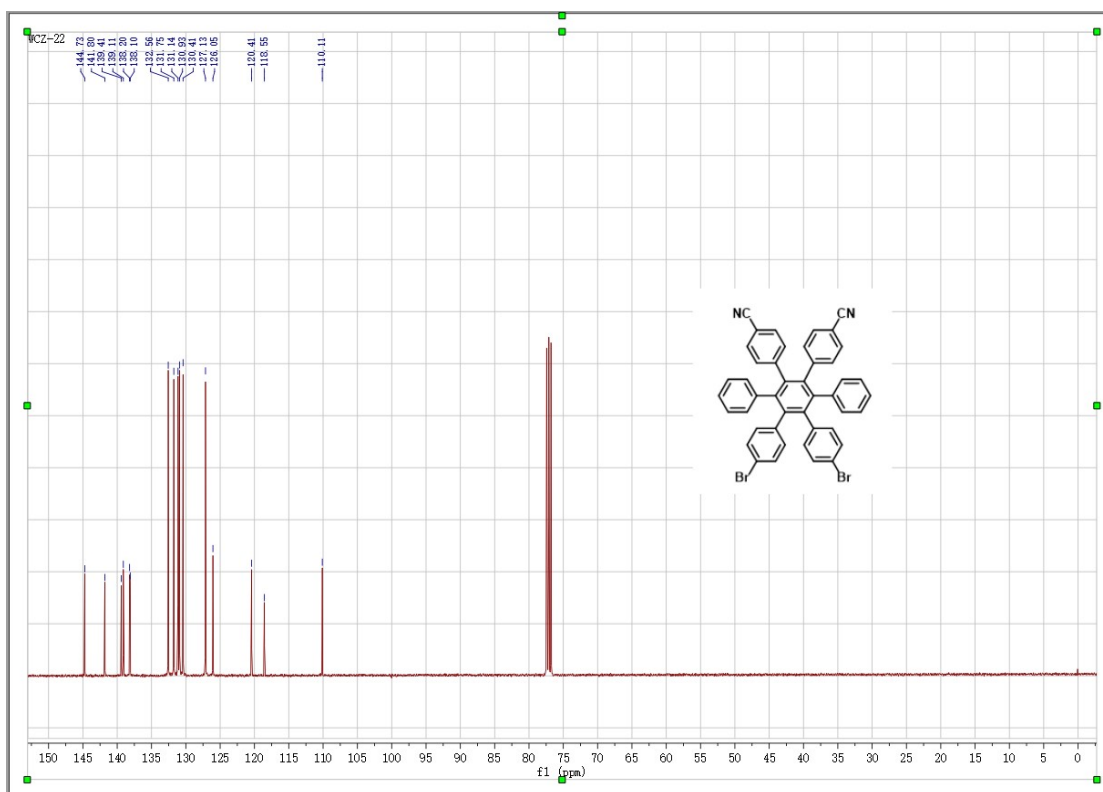

**Figure S8.**  $^{13}\text{C-NMR}$  spectrum of **4b** (100 MHz,  $\text{CDCl}_3$ ).

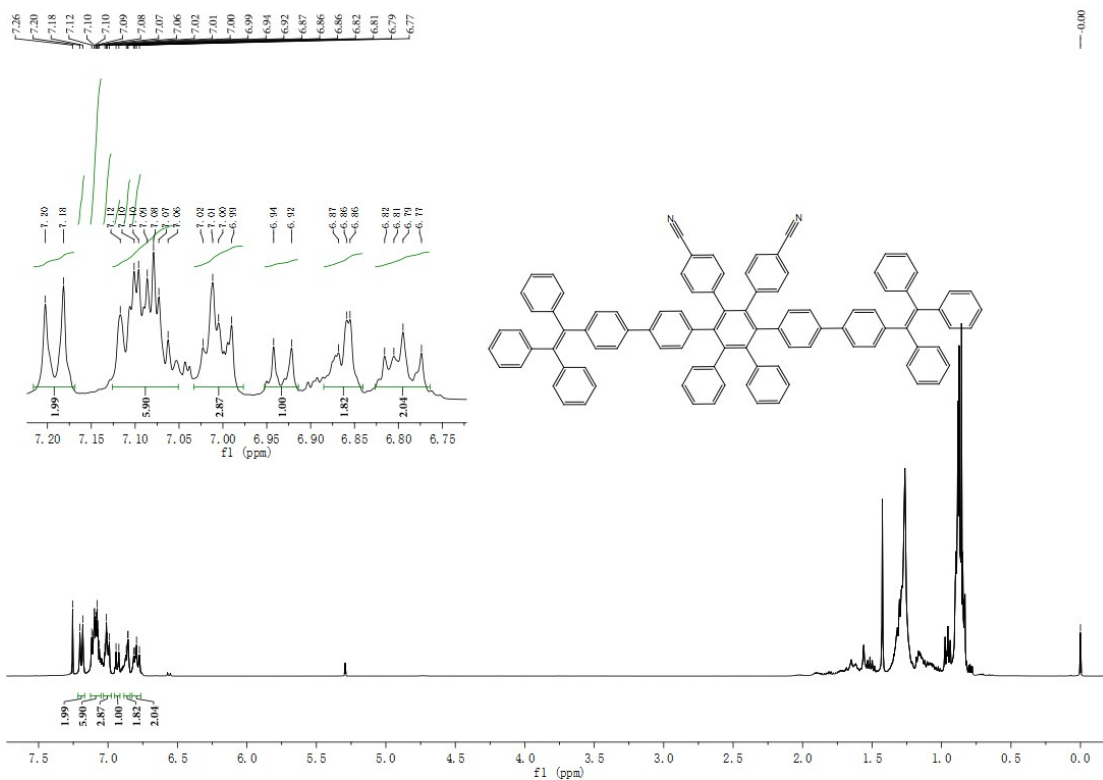

**Figure S9.**  $^1\text{H-NMR}$  spectrum of *p*-TPE-HAB (400 MHz, 293 K,  $\text{CDCl}_3$ ).

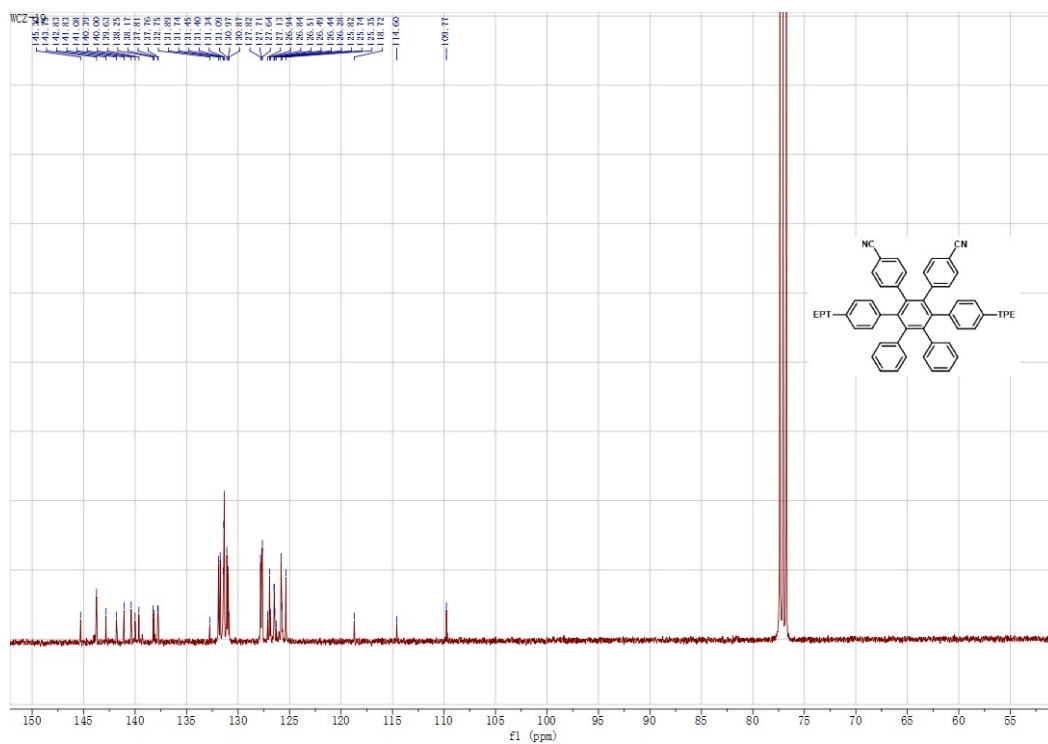

**Figure S10.** <sup>13</sup>C-NMR spectrum of *p*-TPE-HAB (100 MHz, 293 K, CDCl<sub>3</sub>).

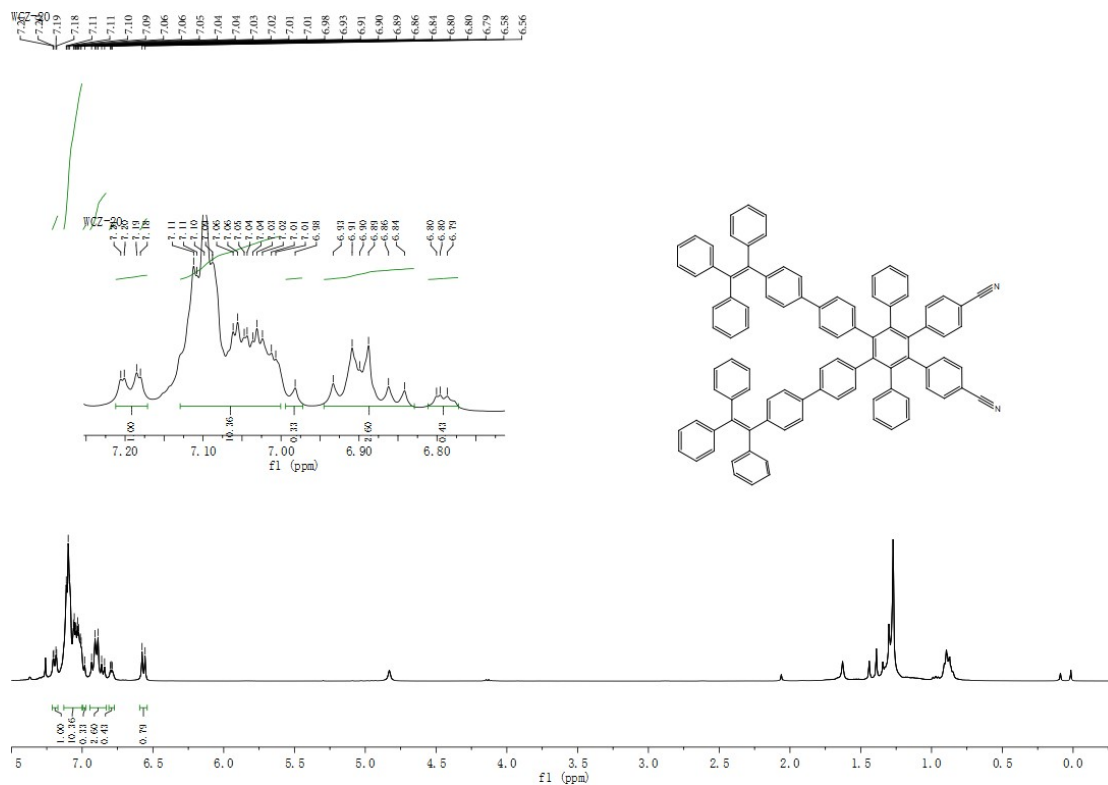

**Figure S11.** <sup>1</sup>H-NMR spectrum of *o*-TPE-HAB (400 MHz, 293 K, CDCl<sub>3</sub>).

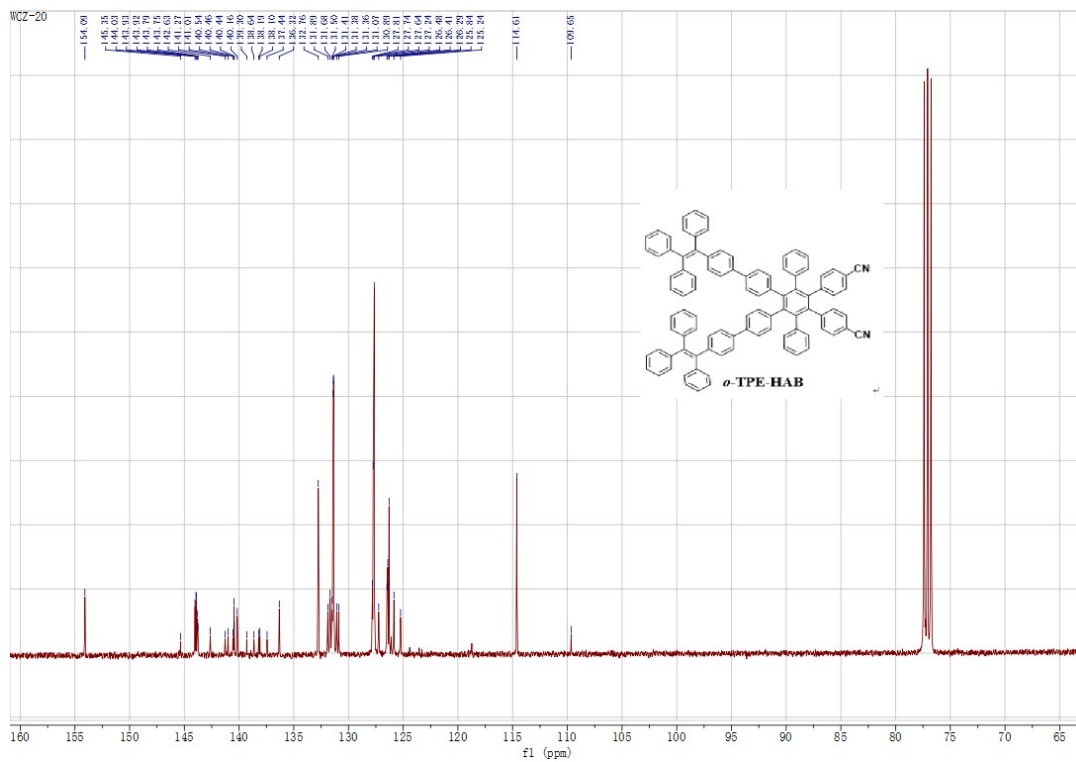

**Figure S12.** <sup>13</sup>C-NMR spectrum of *o*-TPE-HAB (100 MHz, 293 K, CDCl<sub>3</sub>).

**Acquisition Parameter**

|                       |            |                      |           |                       |                          |
|-----------------------|------------|----------------------|-----------|-----------------------|--------------------------|
| Acquisition Mode      | Single MS  | Acquired Scans       | 9         | Calibration Date      | Fri Nov 10 05:21:59 2023 |
| Polarity              | Positive   | No. of Cell Fills    | 1         | Data Acquisition Size | 2097152                  |
| Broadband Low Mass    | 202.1 m/z  | No. of Laser Shots   | 10        | Data Processing Size  | 4194304                  |
| Broadband High Mass   | 1000.0 m/z | Laser Power          | 27.2 lp   | Apodization           | Sine-Bell Multiplication |
| Source Accumulation   | 0.001 sec  | Laser Shot Frequency | 0.020 sec |                       |                          |
| Ion Accumulation Time | 0.010 sec  |                      |           |                       |                          |

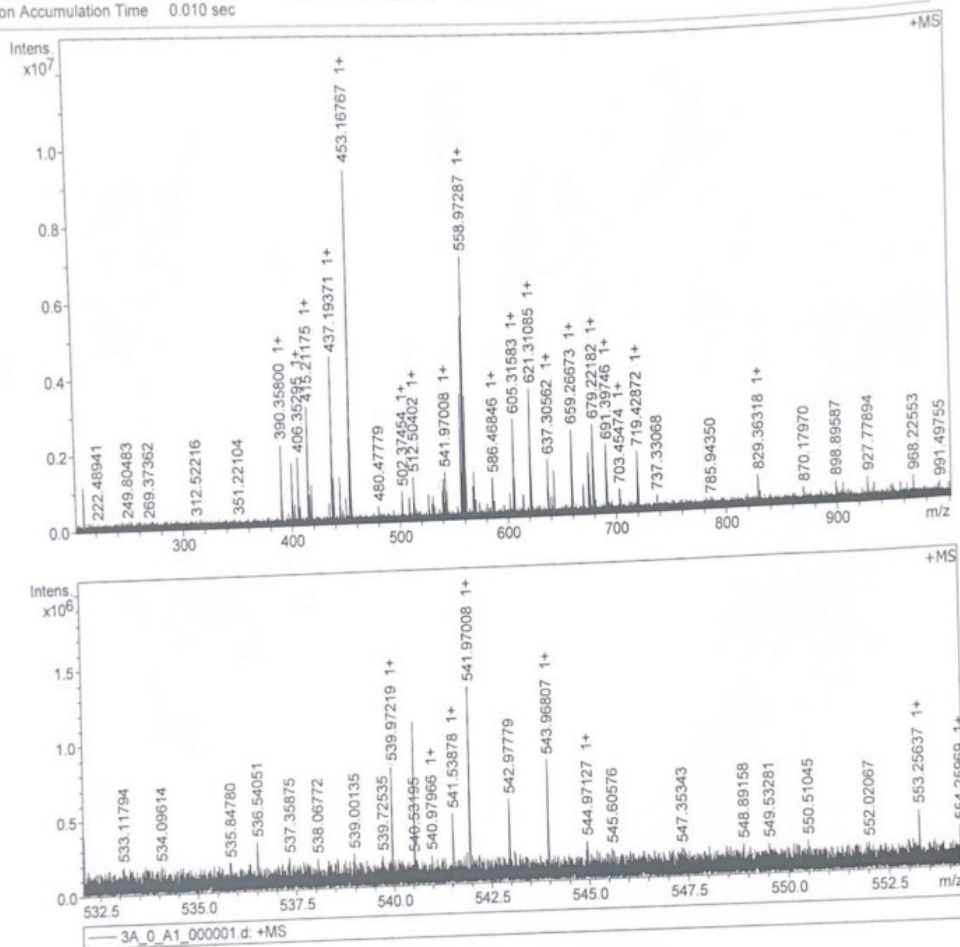

| Meas. m/z  | # | Ion Formula                                       | Score  | m/z        | err [ppm] | Mean err [ppm] | mSigma | rdb  | e <sup>-</sup> Conf | N-Rule |
|------------|---|---------------------------------------------------|--------|------------|-----------|----------------|--------|------|---------------------|--------|
| 539.972193 | 1 | C <sub>29</sub> H <sub>18</sub> Br <sub>2</sub> O | 100.00 | 539.971891 | -0.6      | 0.0            | 84.4   | 20.0 | odd                 | ok     |

**Figure S13.** High resolution MS spectrum of **3a**.



**Acquisition Parameter**  
 Acquisition Mode: Single MS  
 Polarity: Positive  
 Broadband Low Mass: 202.1 m/z  
 Broadband High Mass: 1000.0 m/z  
 Source Accumulation: 0.001 sec  
 Ion Accumulation Time: 0.010 sec  
 Acquired Scans: 3  
 No. of Cell Fills: 1  
 No. of Laser Shots: 10  
 Laser Power: 31.8 lp  
 Laser Shot Frequency: 0.020 sec  
 Calibration Date: Fri Nov 10 05:21:59 2023  
 Data Acquisition Size: 2097152  
 Data Processing Size: 4194304  
 Apodization: Sine-Bell Multiplication

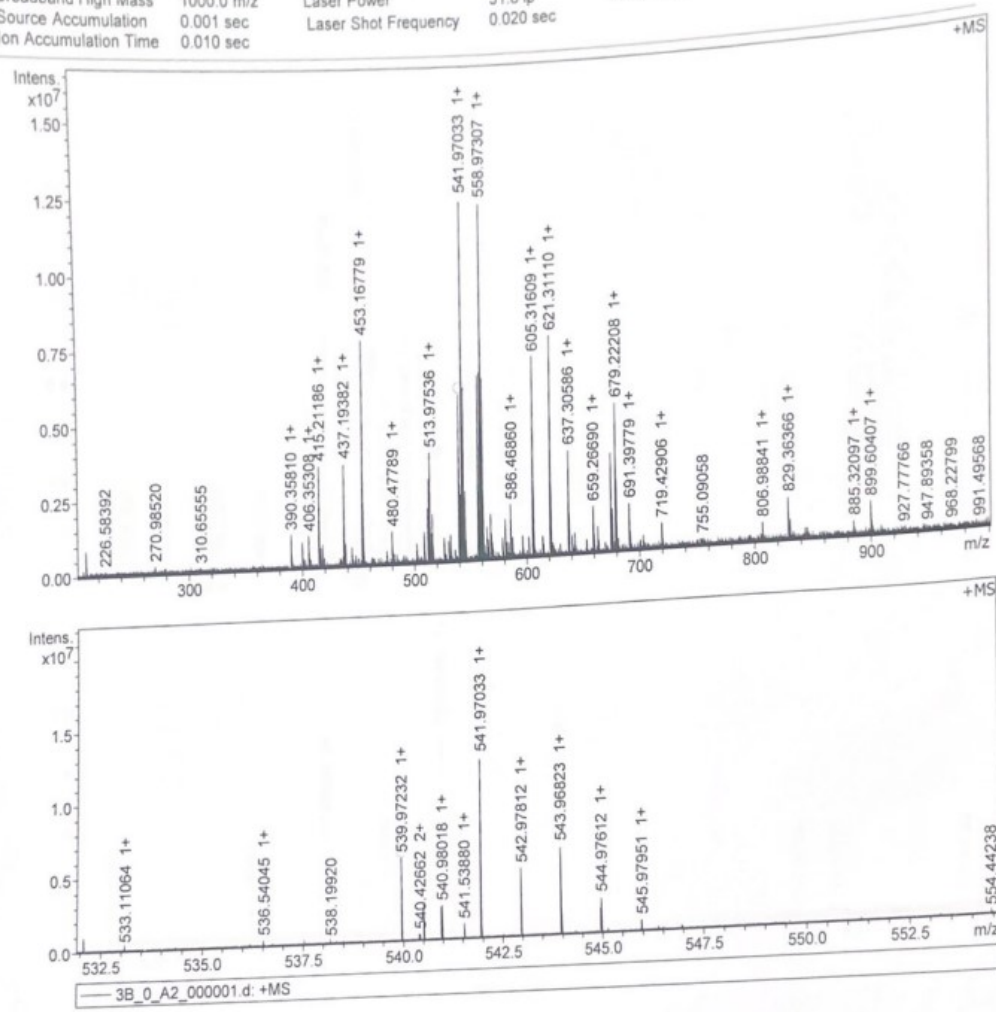

| Meas. m/z  | # | Ion Formula                                       | Score  | m/z        | err [ppm] | Mean err [ppm] | mSigma | rdb  | e <sup>-</sup> Conf | N-Rule |
|------------|---|---------------------------------------------------|--------|------------|-----------|----------------|--------|------|---------------------|--------|
| 539.972317 | 1 | C <sub>29</sub> H <sub>18</sub> Br <sub>2</sub> O | 100.00 | 539.971891 | 0.8       | -0.3           | 22.9   | 20.0 | odd                 | ok     |

**Figure S14.** High resolution MS spectrum of **3b**.

**Acquisition Parameter**  
 Acquisition Mode: Single MS  
 Polarity: Positive  
 Broadband Low Mass: 202.1 m/z  
 Broadband High Mass: 1500.0 m/z  
 Source Accumulation: 0.001 sec  
 Ion Accumulation Time: 0.010 sec  
 Acquired Scans: 3  
 No. of Cell Fills: 1  
 No. of Laser Shots: 10  
 Laser Power: 31.8 lp  
 Laser Shot Frequency: 0.020 sec  
 Calibration Date: Fri Nov 10 05:21:59 2023  
 Data Acquisition Size: 2097152  
 Data Processing Size: 4194304  
 Apodization: Sine-Bell Multiplication

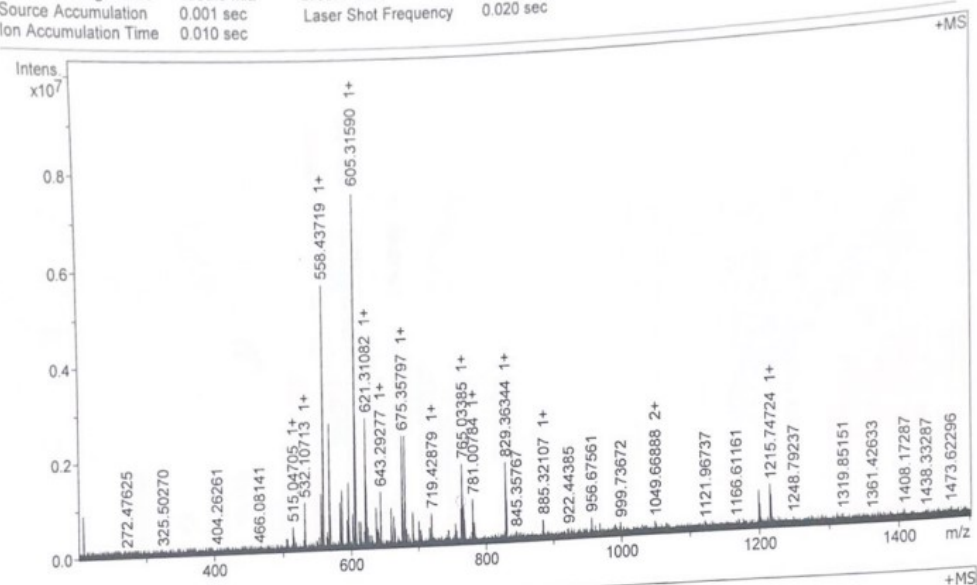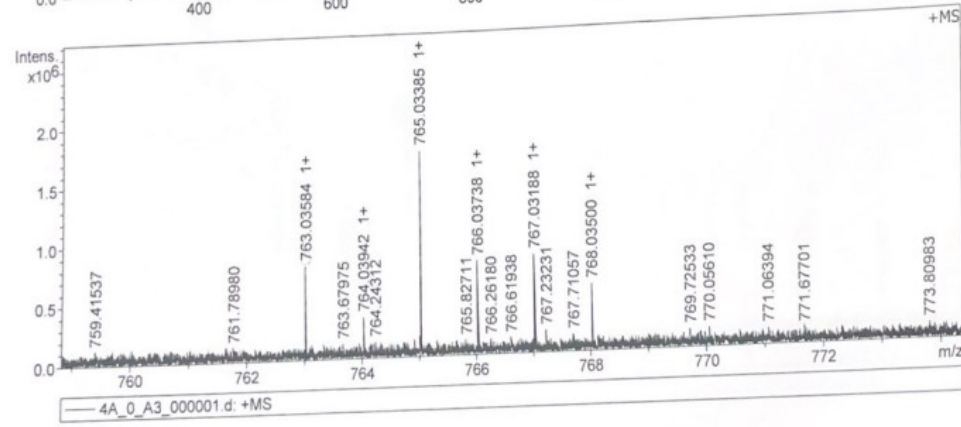

— 4A\_0\_A3\_000001.d: +MS

| Meas. m/z  | # | Ion Formula   | Score  | m/z        | err [ppm] | Mean err [ppm] | mSigma | rdb  | e <sup>-</sup> Conf | N-Rule |
|------------|---|---------------|--------|------------|-----------|----------------|--------|------|---------------------|--------|
| 763.035837 | 1 | C44H26Br2N2Na | 100.00 | 763.035494 | 0.5       | 0.1            | 49.7   | 31.5 | even                | ok     |

**Figure S15.** High resolution MS spectrum of **4a**.

**Acquisition Parameter**

Acquisition Mode Single MS  
 Polarity Positive  
 Broadband Low Mass 202.1 m/z  
 Broadband High Mass 1500.0 m/z  
 Source Accumulation 0.001 sec  
 Ion Accumulation Time 0.010 sec

Acquired Scans 5  
 No. of Cell Fills 1  
 No. of Laser Shots 10  
 Laser Power 31.8 lp  
 Laser Shot Frequency 0.020 sec

Calibration Date Fri Nov 10 05 21 59 2023  
 Data Acquisition Size 2097152  
 Data Processing Size 4194304  
 Apodization Sine-Bell Multiplication

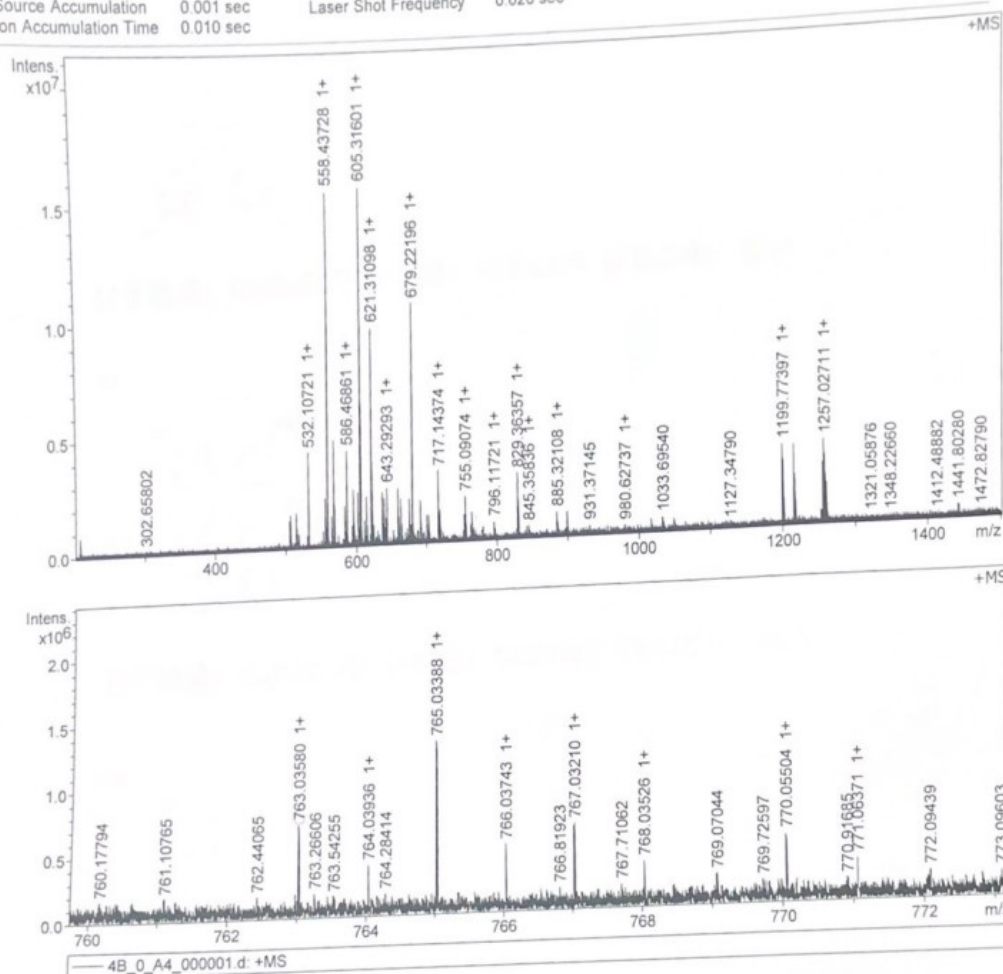

| Meas. m/z | # | Ion Formula                                                       | Score  | m/z        | err [ppm] | Mean err [ppm] | mSigma | rdb  | e <sup>-</sup> Conf | N-Rule |
|-----------|---|-------------------------------------------------------------------|--------|------------|-----------|----------------|--------|------|---------------------|--------|
| 763.03580 | 1 | C <sub>44</sub> H <sub>26</sub> Br <sub>2</sub> N <sub>2</sub> Na | 100.00 | 763.035494 | 0.4       | -0.0           | 53.6   | 31.5 | even                | ok     |

**Figure S16.** High resolution MS spectrum of **4b**.

**Analysis Info**

Analysis Name D:\Data\MALDI\2024\0222\O-HAB\_0\_D4\_000001.d  
 Method MALDI\_P\_100-3000  
 Sample Name MURU-N-ESI  
 Comment

Acquisition Date 2/22/2024 5:19:24 PM

Operator  
 Instrument solariX

**Acquisition Parameter**

|                       |            |                      |           |                       |                          |
|-----------------------|------------|----------------------|-----------|-----------------------|--------------------------|
| Acquisition Mode      | Single MS  | Acquired Scans       | 6         | Calibration Date      | Fri Nov 10 05:21:59 2023 |
| Polarity              | Positive   | No. of Cell Fills    | 1         | Data Acquisition Size | 2097152                  |
| Broadband Low Mass    | 202.1 m/z  | No. of Laser Shots   | 10        | Data Processing Size  | 4194304                  |
| Broadband High Mass   | 2300.0 m/z | Laser Power          | 19.4 lp   | Apodization           | Sine-Bell Multiplication |
| Source Accumulation   | 0.001 sec  | Laser Shot Frequency | 0.020 sec |                       |                          |
| Ion Accumulation Time | 0.010 sec  |                      |           |                       |                          |

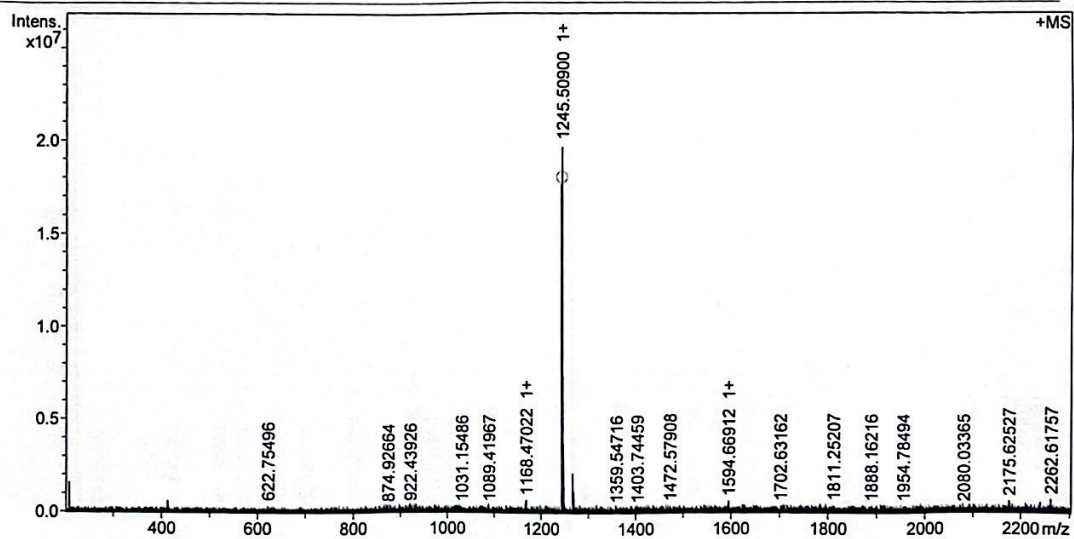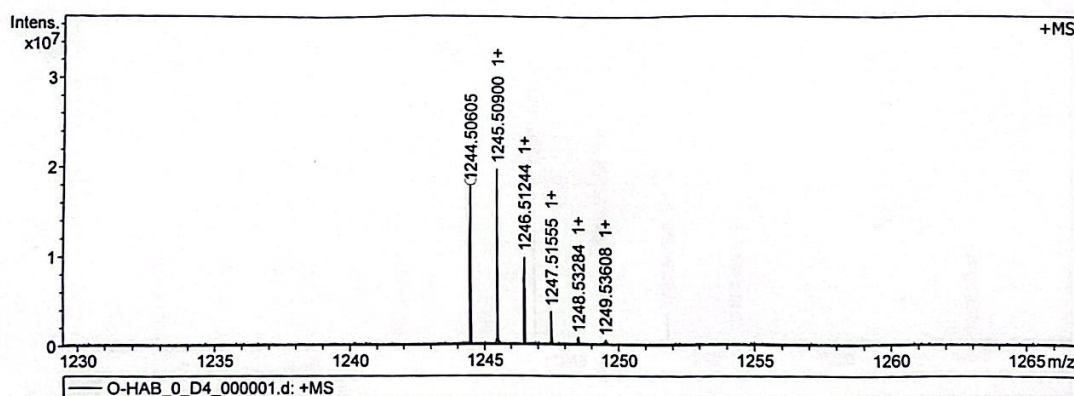

| Meas. m/z   | # | Ion Formula | Score  | m/z         | err [ppm] | Mean err [ppm] | mSigma | rdb  | e <sup>-</sup> Conf | N-Rule |
|-------------|---|-------------|--------|-------------|-----------|----------------|--------|------|---------------------|--------|
| 1244.506054 | 1 | C96H64N2    | 100.00 | 1244.506401 | -0.3      | 0.5            | 24.8   | 66.0 | odd                 | ok     |

**Figure S17.** High resolution MS spectrum of *p*-TPE-HAB.

# MALDI,P-HAB,20240222

## Analysis Info

Analysis Name D:\Data\MALDI\2024\0222\IP-HAB\_0\_D5\_000001.d  
 Method MALDI\_P\_100-3000  
 Sample Name MURU-N-ESI  
 Comment

Acquisition Date 2/22/2024 5:20:21 PM

Operator  
 Instrument solariX

## Acquisition Parameter

|                       |            |                      |           |                       |                          |
|-----------------------|------------|----------------------|-----------|-----------------------|--------------------------|
| Acquisition Mode      | Single MS  | Acquired Scans       | 5         | Calibration Date      | Fri Nov 10 05:21:59 2023 |
| Polarity              | Positive   | No. of Cell Fills    | 1         | Data Acquisition Size | 2097152                  |
| Broadband Low Mass    | 202.1 m/z  | No. of Laser Shots   | 10        | Data Processing Size  | 4194304                  |
| Broadband High Mass   | 2300.0 m/z | Laser Power          | 26.8 lp   | Apodization           | Sine-Bell Multiplication |
| Source Accumulation   | 0.001 sec  | Laser Shot Frequency | 0.020 sec |                       |                          |
| Ion Accumulation Time | 0.010 sec  |                      |           |                       |                          |

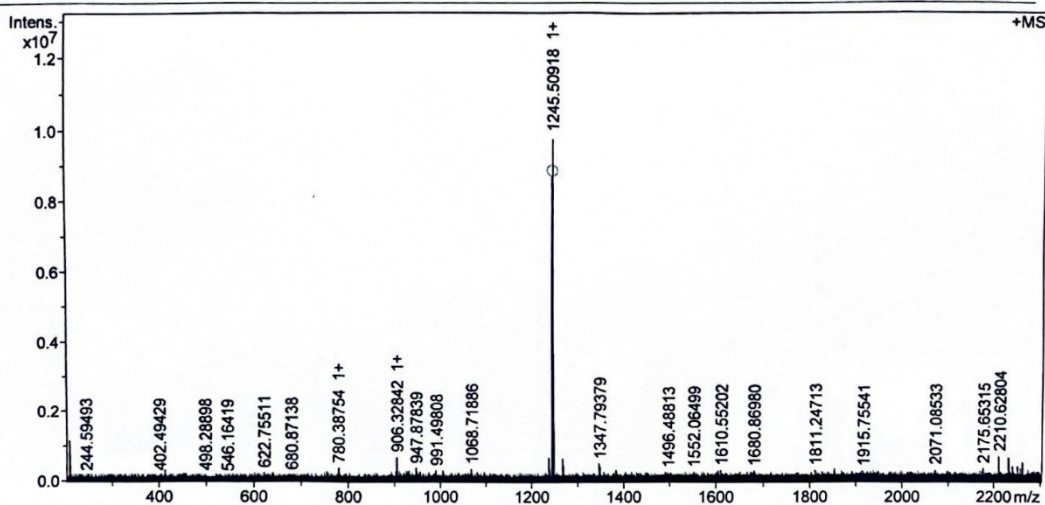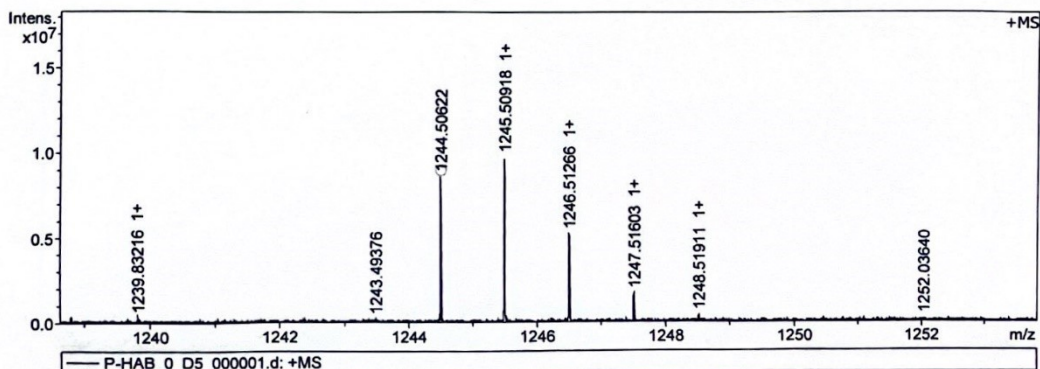

| Meas. m/z   | # | Ion Formula | Score  | m/z         | err [ppm] | Mean err [ppm] | mSigma | rdb  | e <sup>-</sup> Conf | N-Rule |
|-------------|---|-------------|--------|-------------|-----------|----------------|--------|------|---------------------|--------|
| 1244.506217 | 1 | C96H64N2    | 100.00 | 1244.506401 | 0.1       | 0.3            | 27.2   | 66.0 | odd                 | ok     |

Figure S18. High resolution MS spectrum of *o*-TPE-HAB.



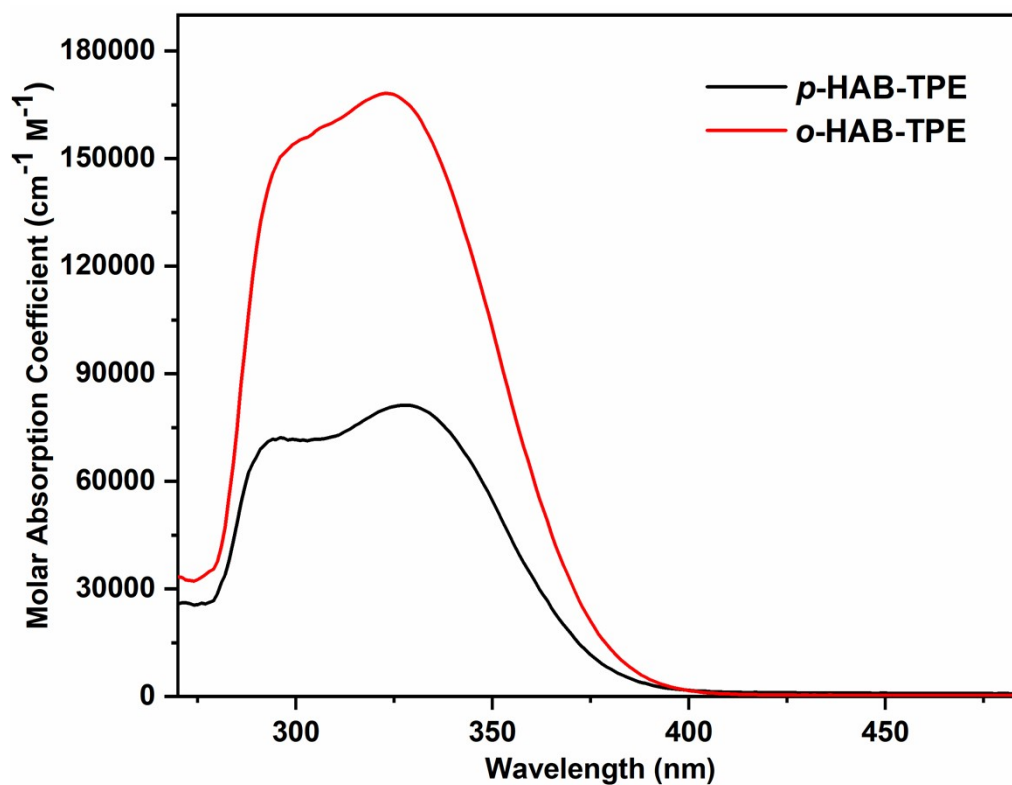

Figure S19. UV-Vis absorption spectra of compounds *p*-TPE-HAB and *o*-TPE-HAB.

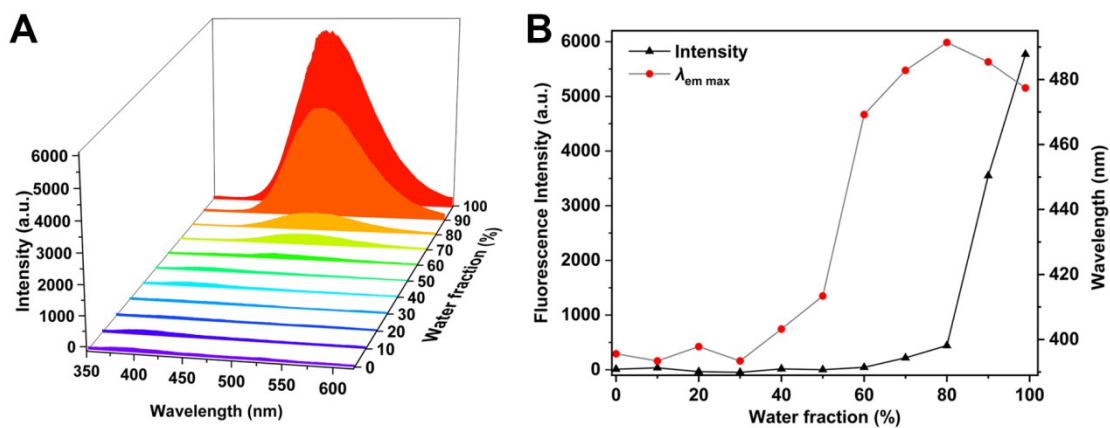

Figure S20. (A) The fluorescence spectra of *o*-TPE-HAB in mixed H<sub>2</sub>O/THF solutions ( $1 \times 10^{-6}$  M); (B) Plots of maximum emission wavelength and emission intensity at different water fractions (0–99 vol%) for *o*-TPE-HAB.

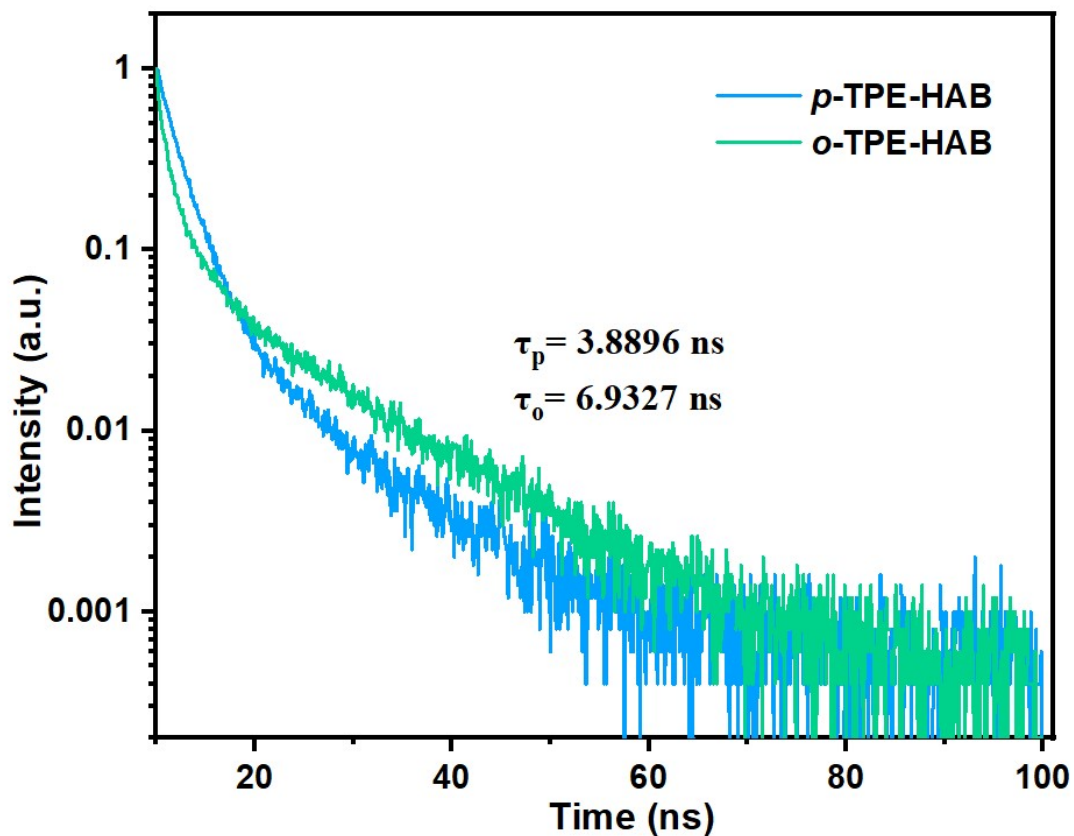

Figure S21. Decay curves of *p*-TPE-HAB and *o*-TPE-HAB in THF solution.

Table S1. Cartesian coordinates of the optimized geometry of *p*-TPE-HAB

|   |           |           |           |
|---|-----------|-----------|-----------|
| C | 0.639247  | -1.486922 | -0.108831 |
| C | -0.754816 | -1.431604 | -0.108267 |
| C | -1.403916 | -0.197153 | -0.103477 |
| C | -0.658891 | 0.982730  | -0.098048 |
| C | 0.734834  | 0.927345  | -0.098133 |
| C | 1.383979  | -0.307558 | -0.103922 |
| C | 1.557441  | 2.229221  | -0.092132 |
| C | 1.932825  | 2.822812  | -1.297104 |
| C | 1.927645  | 2.814877  | 1.119137  |
| C | 2.677384  | 4.002673  | -1.291566 |
| H | 1.640922  | 2.361719  | -2.251792 |
| C | 2.672431  | 3.994200  | 1.124596  |
| H | 1.631603  | 2.346638  | 2.069089  |
| C | 3.047007  | 4.588376  | -0.080831 |
| H | 2.972861  | 4.470748  | -2.241694 |
| H | 2.964356  | 4.456005  | 2.079054  |
| C | -1.375918 | 2.345611  | -0.092676 |
| C | -1.699003 | 2.968672  | -1.297928 |
| C | -1.702090 | 2.957457  | 1.118304  |
| C | -2.349305 | 4.202995  | -1.292963 |

|   |           |           |           |
|---|-----------|-----------|-----------|
| H | -1.442420 | 2.486581  | -2.252389 |
| C | -2.351812 | 4.191708  | 1.123192  |
| H | -1.447196 | 2.466032  | 2.068476  |
| C | -2.675806 | 4.814362  | -0.082519 |
| H | -2.604339 | 4.693848  | -2.243312 |
| H | -2.609001 | 4.674174  | 2.077422  |
| C | -2.942700 | -0.135977 | -0.103741 |
| C | -3.639314 | -0.101888 | -1.311545 |
| C | -3.640162 | -0.114252 | 1.104684  |
| C | -5.033404 | -0.047269 | -1.311688 |
| H | -3.089971 | -0.119366 | -2.263994 |
| C | -5.033899 | -0.059168 | 1.104466  |
| H | -3.090689 | -0.141079 | 2.056868  |
| C | -5.730615 | -0.026069 | -0.103798 |
| H | -5.582452 | -0.020849 | -2.264049 |
| H | -5.583869 | -0.042026 | 2.056680  |
| C | -1.576656 | -2.733962 | -0.114778 |
| C | -1.951226 | -3.316463 | -1.325402 |
| C | -1.946979 | -3.331152 | 1.090810  |
| C | -2.695090 | -4.496761 | -1.331203 |
| H | -1.659228 | -2.846279 | -2.275616 |
| C | -2.691070 | -4.510911 | 1.084935  |
| H | -1.651578 | -2.871655 | 2.045220  |
| C | -3.064832 | -5.093993 | -0.126150 |
| H | -2.989925 | -4.956092 | -2.285787 |
| H | -2.983089 | -4.981805 | 2.034912  |
| H | -3.651265 | -6.024158 | -0.130538 |
| C | 1.355693  | -2.850106 | -0.114752 |
| C | 1.679272  | -3.462900 | -1.325125 |
| C | 1.680843  | -3.472501 | 1.091116  |
| C | 2.329047  | -4.697499 | -1.330386 |
| H | 1.423495  | -2.972494 | -2.275557 |
| C | 2.330038  | -4.707028 | 1.085777  |
| H | 1.425560  | -2.989171 | 2.045327  |
| C | 2.654528  | -5.319411 | -0.125050 |
| H | 2.584471  | -5.180257 | -2.284769 |
| H | 2.586422  | -5.197807 | 2.035976  |
| H | 3.166493  | -6.292553 | -0.129014 |
| C | 2.922778  | -0.368365 | -0.104291 |
| C | 3.619966  | -0.400565 | 1.103233  |
| C | 3.619710  | -0.390855 | -1.313008 |
| C | 5.014006  | -0.456456 | 1.102794  |
| H | 3.071012  | -0.383223 | 2.055908  |
| C | 5.013435  | -0.446254 | -1.313367 |



|   |            |           |           |
|---|------------|-----------|-----------|
| H | 3.069789   | -0.365399 | -2.264972 |
| C | 5.710645   | -0.479454 | -0.105392 |
| H | 5.563471   | -0.482286 | 2.054930  |
| H | 5.562988   | -0.463983 | -2.265812 |
| C | -7.269424  | 0.034470  | -0.103699 |
| C | -7.952074  | 0.426964  | 1.047458  |
| C | -7.980914  | -0.303812 | -1.255464 |
| C | -9.346126  | 0.482545  | 1.047208  |
| H | -7.391646  | 0.693955  | 1.955135  |
| C | -9.374649  | -0.248677 | -1.255494 |
| H | -7.442454  | -0.613306 | -2.162972 |
| C | -10.057318 | 0.144905  | -0.104206 |
| H | -9.884128  | 0.792446  | 1.954764  |
| H | -9.935673  | -0.515229 | -2.163060 |
| C | 7.249419   | -0.540894 | -0.106132 |
| C | 7.960970   | -0.192235 | -1.253892 |
| C | 7.931924   | -0.945859 | 1.041651  |
| C | 9.355048   | -0.247164 | -1.254216 |
| H | 7.423416   | 0.127284  | -2.158428 |
| C | 9.325651   | -1.001206 | 1.041105  |
| H | 7.370675   | -1.220773 | 1.946482  |
| C | 10.037307  | -0.651461 | -0.106777 |
| H | 9.915874   | 0.028193  | -2.159089 |
| H | 9.863835   | -1.320333 | 1.945533  |
| C | -11.596108 | 0.205939  | -0.104649 |
| C | -12.321764 | -0.872275 | 0.279336  |
| C | 11.576101  | -0.712412 | -0.106969 |
| C | 12.301570  | 0.364146  | 0.281983  |
| C | -11.613234 | -2.166948 | 0.719117  |
| C | -11.271305 | -2.354790 | 2.058154  |
| C | -11.312922 | -3.152155 | -0.222370 |
| C | -10.630129 | -3.528076 | 2.456611  |
| H | -11.508164 | -1.578743 | 2.800373  |
| C | -10.671474 | -4.324927 | 0.175984  |
| H | -11.582566 | -3.003799 | -1.278107 |
| C | -10.330392 | -4.513099 | 1.515635  |
| H | -10.361032 | -3.676170 | 3.512451  |
| H | -10.434650 | -5.101570 | -0.565780 |
| H | -9.824889  | -5.437814 | 1.829478  |
| C | -12.312748 | 1.496646  | -0.542944 |
| C | -12.642768 | 1.690339  | -1.884134 |
| C | -12.631630 | 2.472744  | 0.401918  |
| C | -13.292719 | 2.859332  | -2.280986 |
| H | -12.391932 | 0.921147  | -2.628893 |

|   |            |           |           |
|---|------------|-----------|-----------|
| C | -13.281001 | 3.641642  | 0.005013  |
| H | -12.371268 | 2.319828  | 1.459332  |
| C | -13.611933 | 3.834803  | -1.336472 |
| H | -13.553222 | 3.011650  | -3.338379 |
| H | -13.532445 | 4.411114  | 0.749435  |
| H | -14.124036 | 4.756290  | -1.649108 |
| C | -13.860184 | -0.802606 | 0.275891  |
| C | -14.572191 | -1.160957 | -0.868596 |
| C | -14.541908 | -0.380487 | 1.417943  |
| C | -15.965953 | -1.098568 | -0.871362 |
| H | -14.035254 | -1.493993 | -1.768611 |
| C | -15.935316 | -0.317686 | 1.414950  |
| H | -13.980299 | -0.097935 | 2.320193  |
| C | -16.647435 | -0.677122 | 0.270353  |
| H | -16.527141 | -1.381566 | -1.773650 |
| H | -16.472885 | 0.014960  | 2.314861  |
| H | -17.745927 | -0.627721 | 0.268288  |
| C | 12.292958  | -2.001148 | -0.550676 |
| C | 12.621228  | -2.190040 | -1.892980 |
| C | 12.613786  | -2.980266 | 0.390395  |
| C | 13.271375  | -3.357247 | -2.294735 |
| H | 12.368857  | -1.418468 | -2.634753 |
| C | 13.263353  | -4.147378 | -0.011412 |
| H | 12.354804  | -2.831136 | 1.448688  |
| C | 13.592535  | -4.335736 | -1.354010 |
| H | 13.530498  | -3.505780 | -3.353006 |
| H | 13.516331  | -4.919229 | 0.730021  |
| H | 14.104793  | -5.255817 | -1.670511 |
| C | 11.592823  | 1.656842  | 0.727196  |
| C | 11.250117  | 1.838642  | 2.066869  |
| C | 11.293090  | 2.646302  | -0.210004 |
| C | 10.608745  | 3.010136  | 2.470249  |
| H | 11.486520  | 1.059240  | 2.805712  |
| C | 10.651445  | 3.817283  | 0.193271  |
| H | 11.563346  | 2.502710  | -1.266243 |
| C | 10.309587  | 3.999411  | 1.533560  |
| H | 10.339036  | 3.153467  | 3.526590  |
| H | 10.415078  | 4.597278  | -0.545114 |
| H | 9.803929   | 4.922715  | 1.851283  |
| C | 13.839994  | 0.294572  | 0.278752  |
| C | 14.552337  | 0.657294  | -0.864149 |
| C | 14.521388  | -0.131834 | 1.419408  |
| C | 15.946103  | 0.594990  | -0.866719 |
| H | 14.015660  | 0.993708  | -1.763063 |

|   |           |           |           |
|---|-----------|-----------|-----------|
| C | 15.914800 | -0.194549 | 1.416609  |
| H | 13.959514 | -0.417832 | 2.320407  |
| C | 16.627254 | 0.169259  | 0.273603  |
| H | 16.507555 | 0.881434  | -1.767754 |
| H | 16.452108 | -0.530574 | 2.315420  |
| H | 17.725749 | 0.119924  | 0.271692  |
| C | -3.393397 | 6.176945  | -0.076781 |
| C | 3.869076  | 5.890591  | -0.074462 |
| N | -3.927676 | 7.191449  | -0.072509 |
| N | 4.481144  | 6.860149  | -0.069720 |

---

Table S2. Cartesian coordinates of the optimized geometry of *o*-TPE-HAB

|   |            |           |           |
|---|------------|-----------|-----------|
| C | -3.909247  | -0.725489 | 0.032079  |
| C | -3.920193  | 0.669515  | 0.014287  |
| C | -5.133257  | 1.357719  | 0.022666  |
| C | -6.336151  | 0.650867  | 0.047648  |
| C | -6.325136  | -0.743807 | 0.064955  |
| C | -5.111602  | -1.432059 | 0.057567  |
| C | -7.675409  | 1.411066  | 0.056811  |
| C | -8.265523  | 1.770087  | 1.268459  |
| C | -8.298829  | 1.740408  | -1.147390 |
| C | -9.478426  | 2.459485  | 1.276644  |
| H | -7.774294  | 1.511010  | 2.217572  |
| C | -9.511677  | 2.429225  | -1.139120 |
| H | -7.833385  | 1.457176  | -2.102606 |
| C | -10.101347 | 2.789149  | 0.072967  |
| H | -9.943291  | 2.742841  | 2.232025  |
| H | -10.003257 | 2.688923  | -2.088003 |
| C | -7.652419  | -1.524295 | 0.092516  |
| C | -8.270411  | -1.892051 | -1.102499 |
| C | -8.237092  | -1.863286 | 1.313360  |
| C | -9.472451  | -2.599825 | -1.077426 |
| H | -7.809713  | -1.625371 | -2.064726 |
| C | -9.439087  | -2.570478 | 1.338348  |
| H | -7.749672  | -1.573164 | 2.255458  |
| C | -10.056634 | -2.939130 | 0.142881  |
| H | -9.959294  | -2.890062 | -2.019705 |
| H | -9.900133  | -2.837784 | 2.300355  |
| C | -5.099779  | -2.971891 | 0.076957  |
| C | -5.111781  | -3.684779 | -1.121738 |
| C | -5.077449  | -3.654036 | 1.294083  |
| C | -5.100265  | -5.079780 | -1.104082 |
| H | -5.129008  | -3.147492 | -2.081043 |

|   |           |           |           |
|---|-----------|-----------|-----------|
| C | -5.066415 | -5.048706 | 1.311664  |
| H | -5.068048 | -3.091735 | 2.239084  |
| C | -5.077427 | -5.761655 | 0.112501  |
| H | -5.109280 | -5.641639 | -2.049267 |
| H | -5.048824 | -5.586607 | 2.270740  |
| H | -5.068528 | -6.861133 | 0.126602  |
| C | -2.569656 | -1.485110 | 0.023452  |
| C | -1.979855 | -1.845554 | -1.187926 |
| C | -1.946013 | -1.813189 | 1.227881  |
| C | -0.765858 | -2.533029 | -1.195655 |
| H | -2.470895 | -1.586828 | -2.137232 |
| C | -0.732544 | -2.500918 | 1.220084  |
| H | -2.411269 | -1.528938 | 2.182885  |
| C | -0.142204 | -2.860533 | 0.008232  |
| H | -0.300795 | -2.816725 | -2.150839 |
| H | -0.240795 | -2.759635 | 2.169148  |
| C | -2.592443 | 1.449227  | -0.012763 |
| C | -2.006257 | 1.786583  | -1.232517 |
| C | -1.975519 | 1.817937  | 1.183344  |
| C | -0.803792 | 2.493656  | -1.256926 |
| H | -2.492374 | 1.496479  | -2.175264 |
| C | -0.773101 | 2.524426  | 1.158865  |
| H | -2.437864 | 1.551781  | 2.144955  |
| C | -0.187371 | 2.862667  | -0.061349 |
| H | -0.342028 | 2.759922  | -2.218705 |
| H | -0.286641 | 2.815150  | 2.101368  |
| C | -5.145439 | 2.897557  | 0.003917  |
| C | -5.135076 | 3.609937  | 1.202928  |
| C | -5.167244 | 3.580208  | -1.212935 |
| C | -5.145309 | 5.004955  | 1.185831  |
| H | -5.117523 | 3.072257  | 2.162008  |
| C | -5.177952 | 4.974888  | -1.229944 |
| H | -5.175470 | 3.018307  | -2.158184 |
| C | -5.166588 | 5.687345  | -0.030492 |
| H | -5.136687 | 5.566421  | 2.131254  |
| H | -5.195145 | 5.513189  | -2.188804 |
| H | -5.174836 | 6.786833  | -0.044148 |
| C | 1.140060  | 3.642932  | -0.088035 |
| C | 1.944976  | 3.689381  | 1.050022  |
| C | 1.537423  | 4.303922  | -1.250967 |
| C | 3.147928  | 4.395623  | 1.025505  |
| H | 1.632277  | 3.168286  | 1.966494  |
| C | 2.739870  | 5.010370  | -1.275259 |
| H | 0.902582  | 4.267206  | -2.148144 |

|   |            |           |           |
|---|------------|-----------|-----------|
| C | 3.545393   | 5.055914  | -0.137072 |
| H | 3.782605   | 4.431750  | 1.922736  |
| H | 3.053311   | 5.531418  | -2.191631 |
| C | 1.197705   | -3.619595 | -0.000038 |
| C | 1.807114   | -3.972332 | 1.203880  |
| C | 1.802406   | -3.954196 | -1.212307 |
| C | 3.020605   | -4.660702 | 1.196282  |
| H | 1.330639   | -3.709110 | 2.159353  |
| C | 3.015842   | -4.641984 | -1.219824 |
| H | 1.321751   | -3.675918 | -2.161427 |
| C | 3.624815   | -4.995622 | -0.015455 |
| H | 3.500684   | -4.939103 | 2.145576  |
| H | 3.492672   | -4.905826 | -2.175069 |
| C | -11.440297 | 3.549896  | 0.081750  |
| C | -11.383589 | -3.720161 | 0.170812  |
| N | -12.437206 | 4.116307  | 0.088290  |
| N | -12.371568 | -4.301674 | 0.191608  |
| C | 4.873066   | 5.835749  | -0.164302 |
| C | 4.882632   | 7.174160  | 0.048138  |
| C | 4.964409   | -5.755235 | -0.024098 |
| C | 4.980281   | -7.110332 | -0.029196 |
| C | 6.194404   | 5.092109  | -0.433867 |
| C | 6.626360   | 4.890022  | -1.744514 |
| C | 6.959464   | 4.620044  | 0.633398  |
| C | 7.823835   | 4.217010  | -1.988602 |
| H | 6.023856   | 5.262237  | -2.585755 |
| C | 8.156405   | 3.946786  | 0.389278  |
| H | 6.618650   | 4.779450  | 1.666710  |
| C | 8.588844   | 3.745585  | -0.921799 |
| H | 8.164440   | 4.058176  | -3.021996 |
| H | 8.759582   | 3.574616  | 1.230194  |
| H | 9.532578   | 3.214970  | -1.114004 |
| C | 5.939845   | 7.795748  | 0.979550  |
| C | 5.810948   | 7.670850  | 2.362665  |
| C | 7.026770   | 8.484410  | 0.439592  |
| C | 6.769202   | 8.233326  | 3.206373  |
| H | 4.954708   | 7.127897  | 2.788454  |
| C | 7.984503   | 9.047133  | 1.283172  |
| H | 7.128158   | 8.582809  | -0.650974 |
| C | 7.855943   | 8.921259  | 2.666660  |
| H | 6.667629   | 8.134358  | 4.296800  |
| H | 8.841238   | 9.589947  | 0.857929  |
| H | 8.611194   | 9.364793  | 3.331493  |
| C | 3.839917   | 8.075628  | -0.638668 |

|    |          |           |           |
|----|----------|-----------|-----------|
| C0 | 2.875029 | 8.732753  | 0.124483  |
| C  | 3.860247 | 8.234718  | -2.024848 |
| C  | 1.930917 | 9.550045  | -0.497738 |
| H  | 2.858986 | 8.607865  | 1.216906  |
| C  | 2.916037 | 9.051455  | -2.646897 |
| H  | 4.621085 | 7.716451  | -2.626362 |
| C  | 1.951531 | 9.709491  | -1.883270 |
| H  | 1.170546 | 10.068396 | 0.104168  |
| H  | 2.931791 | 9.177033  | -3.739351 |
| H  | 1.207388 | 10.353467 | -2.373858 |
| C  | 6.290520 | -4.972277 | -0.026956 |
| C  | 6.889134 | -4.609596 | 1.179421  |
| C  | 6.893121 | -4.625287 | -1.236785 |
| C  | 8.090930 | -3.900970 | 1.176735  |
| H  | 6.414681 | -4.883218 | 2.132976  |
| C  | 8.094385 | -3.916419 | -1.239395 |
| H  | 6.420919 | -4.911306 | -2.187845 |
| C  | 8.693559 | -3.554561 | -0.032556 |
| H  | 8.562951 | -3.615511 | 2.127973  |
| H  | 8.569551 | -3.642796 | -2.192717 |
| H  | 9.640671 | -2.995899 | -0.034857 |
| C  | 6.324365 | -7.861972 | -0.037828 |
| C  | 6.941659 | -8.201283 | 1.165932  |
| C  | 6.924956 | -8.203281 | -1.250270 |
| C  | 8.158936 | -8.882932 | 1.158014  |
| H  | 6.468426 | -7.932774 | 2.121544  |
| C  | 8.142176 | -8.884348 | -1.258110 |
| H  | 6.438083 | -7.935589 | -2.199265 |
| C  | 8.759041 | -9.224558 | -0.053891 |
| H  | 8.645235 | -9.150749 | 2.107187  |
| H  | 8.615769 | -9.153474 | -2.213492 |
| H  | 9.718532 | -9.761648 | -0.060316 |
| C  | 3.658846 | -7.901155 | -0.026387 |
| C  | 3.054118 | -8.253477 | -1.232785 |
| C  | 3.066196 | -8.264961 | 1.183418  |
| C  | 1.857380 | -8.970612 | -1.230144 |
| H  | 3.521107 | -7.967240 | -2.186321 |
| C  | 1.869498 | -8.981513 | 1.185983  |
| H  | 3.543156 | -7.987005 | 2.134494  |
| C  | 1.265226 | -9.334718 | -0.020877 |
| H  | 1.380998 | -9.248675 | -2.181398 |
| H  | 1.402168 | -9.268375 | 2.139286  |
| H  | 0.321918 | -9.899780 | -0.018611 |

---
